# Supplementary material for: Differential Glycemic Effects of Low- versus High-Glycemic Index Mediterranean-Style Eating Patterns in Adults at Risk for Type 2 Diabetes: The MEDGI-Carb Randomized Controlled Trial
Source: MDPI journal article supplement (doi:10.3390/nu14030706), 2022-02-08
Supplement: s1 [file s1]

**ONLINE-ONLY SUPPLEMENTAL MATERIAL**

| <b>Supplemental Table S1. Food Composition of Standardized Meal Glucose Tolerance Test Meals</b> |                 |                                      |                 |
|--------------------------------------------------------------------------------------------------|-----------------|--------------------------------------|-----------------|
| <b>Low-GI</b>                                                                                    |                 | <b>High-GI</b>                       |                 |
| <b>Breakfast</b>                                                                                 | <b>Quantity</b> | <b>Breakfast</b>                     | <b>Quantity</b> |
| Flat bread                                                                                       | 75 g            | Cornflakes                           | 30 g            |
| Olive Oil, Extra Virgin                                                                          | 10 g            | Olive Oil, Extra Virgin              | 18 g            |
| Eggs, whole, raw                                                                                 | 50 g            | Eggs, whole, raw                     | 50 g            |
| Ham, dry cured (country style)                                                                   | 38 g            | Ham, dry cured (country style)       | 85 g            |
| Apple, fresh without skin)                                                                       | 150 g           | Apple, fresh without skin            | 150 g           |
| milk, 1% fat or lowfat, lactose free                                                             | 244 g           | milk, 1% fat or lowfat, lactose free | 244 g           |
|                                                                                                  |                 | Bread, wholegrain                    | 24 g            |
|                                                                                                  |                 |                                      |                 |
| <b>Lunch</b>                                                                                     |                 | <b>Lunch</b>                         |                 |
| Spaghetti noodles, white,                                                                        | 90 g            | Rice, jasmine                        | 88 g            |
| Chicken, breast, skinless                                                                        | 58 g            | Chicken, breast, skinless            | 70 g            |
| Tomato sauce, plain, regular                                                                     | 50 g            | Tomato sauce, plain, regular         | 50 g            |
| Olive Oil, Extra Virgin                                                                          | 10 g            | Olive Oil, Extra Virgin              | 10 g            |
| Broccoli, cooked from frozen                                                                     | 90 g            | Broccoli, cooked from frozen         | 90 g            |
| Carrots, cooked from frozen                                                                      | 100 g           | Carrots, cooked from frozen          | 100 g           |
| Apple, fresh, without skin                                                                       | 150 g           | Apple, fresh, without skin           | 150 g           |

1 **Supplemental Table S2.** Dietary composition before and after a low- and high-GI Mediterranean dietary intervention

|                              | Baseline   |            |         | Post-intervention |             |         |
|------------------------------|------------|------------|---------|-------------------|-------------|---------|
|                              | Low-GI     | High-GI    | p-value | Low-GI            | High-GI     | p-value |
| <b>Energy (kcal/day)</b>     | 1923±508   | 1939±503   | 0.845   | 2344±609*         | 2257±463*   | 0.314   |
| <b>Proteins (% of TE)</b>    | 16.6±3.0   | 16.6±3.1   | 0.914   | 18.7±3.9*         | 18.6±2.7*   | 0.877   |
| <b>Fat (% of TE)</b>         | 38.4±6.2   | 38.1±5.7   | 0.744   | 36.0±6.0          | 35.6±5.8*   | 0.632   |
| <b>SFA (% of TE)</b>         | 13.2±4.0   | 13.5±3.9   | 0.608   | 9.6±2.8*          | 9.8±3.2*    | 0.764   |
| <b>MUFA (% of TE)</b>        | 15.3±3.5   | 14.3±3.0   | 0.067   | 16.3±4.1*         | 16.7±3.3*   | 0.531   |
| <b>PUFA (% of TE)</b>        | 5.6±2.4    | 5.7±2.7    | 0.814   | 4.8±1.6*          | 4.8±1.4*    | 0.994   |
| <b>Cholesterol (mg/day)</b>  | 291±141    | 292±133    | 0.983   | 328±208           | 341±219     | 0.684   |
| <b>Carbohydrates (g/day)</b> | 219.6±64.4 | 222.5±62.4 | 0.775   | 259.0±46.6*       | 253.1±34.5* | 0.373   |
| <b>(% of TE)</b>             | 42.9±6.4   | 43.2±6.0   | 0.791   | 42.5±6.4          | 43.0±6.6    | 0.585   |
| <b>Starch (g/day)</b>        | 151.5±48.5 | 151.0±50.6 | 0.952   | 192.7±50.5*       | 184.9±54.2* | 0.350   |
| <b>Sugars (% of TE)</b>      | 13.1±5.3   | 13.9±5.5   | 0.363   | 11.0±6.5*         | 12.0±7.3*   | 0.343   |
| <b>Fiber (g/day)</b>         | 19.4±7.5   | 20.2±5.9   | 0.489   | 32.4±7.1*         | 30.8±5.8*   | 0.113   |
| <b>(% of TE)</b>             | 2.0±0.6    | 2.1±0.6    | 0.289   | 2.8±0.6*          | 2.8±0.6*    | 0.786   |
| <b>Glycemic index (au)</b>   | 59.0±6.3   | 59.4±5.6   | 0.299   | 46.8±3.1*         | 66.2±4.7*   | <0.0001 |
| <b>Alcohol (g/day)</b>       | 9.1±12.8   | 8.0±11.9   | 0.564   | 2.3±4.4*          | 3.7±7.0*    | 0.109   |

\*Statistically significant,  $p < 0.05$ .

| Supplemental Table S3. Effect of Low- versus High-GI Healthy Eating Patterns on Risk Factors for Type 2 Diabetes |                 |                 |                  |                 |                 |                                       |                      |                  |                |
|------------------------------------------------------------------------------------------------------------------|-----------------|-----------------|------------------|-----------------|-----------------|---------------------------------------|----------------------|------------------|----------------|
| Health Parameter                                                                                                 | Low-GI          |                 |                  | High-GI         |                 |                                       |                      | Pooled           |                |
|                                                                                                                  | Baseline        | Post (Week 12)  | $\Delta$         | Baseline        | Post (Week 12)  | $\Delta$                              | p-value (Group*Time) | $\Delta$         | p-value (Time) |
| <b>Glucose (mmol/L)</b>                                                                                          | 5.7 $\pm$ 0.1   | 5.6 $\pm$ 0.1   | 0.0 $\pm$ 0.1    | 5.8 $\pm$ 0.1   | 5.7 $\pm$ 0.1   | -0.1 $\pm$ 0.1                        | 0.48                 | 0.0 $\pm$ 0.0    | 0.45           |
| <b>Insulin (pmol/L)</b>                                                                                          | 100.2 $\pm$ 6.9 | 98.3 $\pm$ 7.1  | -1.9 $\pm$ 6.9   | 103.7 $\pm$ 6.8 | 100.0 $\pm$ 7.2 | -3.6 $\pm$ 7.2                        | 0.84                 | -2.8 $\pm$ 5.6   | 0.62           |
| <b>HbA1c (%)</b>                                                                                                 | 5.43 $\pm$ 0.04 | 5.40 $\pm$ 0.04 | -0.02 $\pm$ 0.02 | 5.47 $\pm$ 0.04 | 5.42 $\pm$ 0.04 | <b>-0.051 <math>\pm</math> 0.025*</b> | 0.33                 | -0.04 $\pm$ 0.02 | 0.07           |
| <b>HOMA:IR</b>                                                                                                   | 3.71 $\pm$ 0.28 | 3.63 $\pm$ 0.29 | -0.08 $\pm$ 0.29 | 3.97 $\pm$ 0.28 | 3.74 $\pm$ 0.30 | -0.22 $\pm$ 0.30                      | 0.70                 | -0.15 $\pm$ 0.24 | 0.52           |
| Data are mean $\pm$ SEM. *Statistically significant, p < 0.05.                                                   |                 |                 |                  |                 |                 |                                       |                      |                  |                |

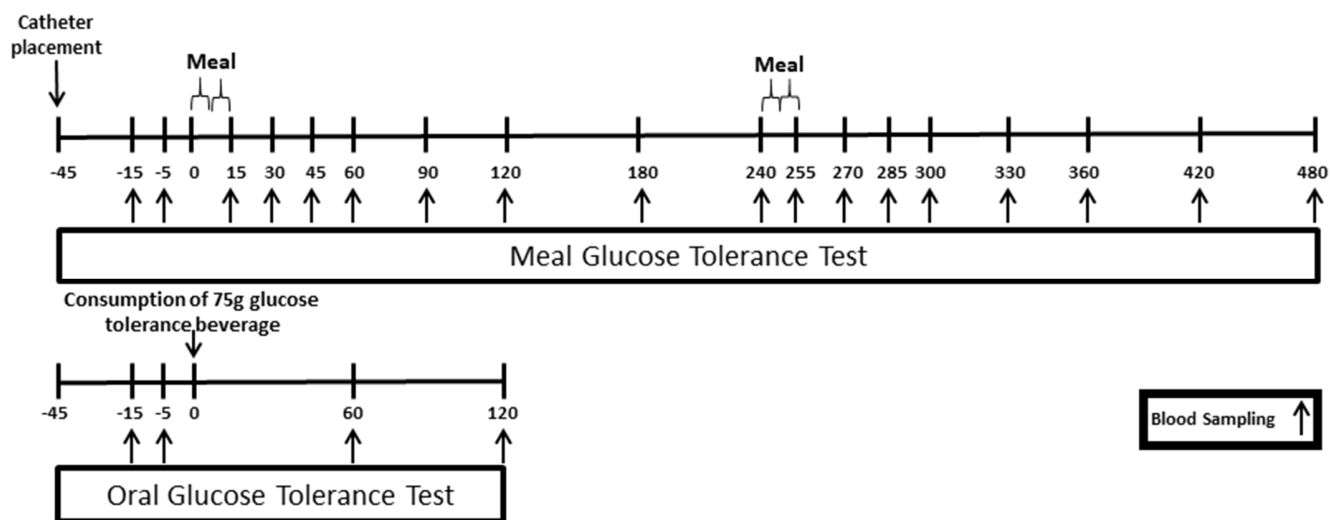

**Supplemental Figure S1** - Meal- and oral glucose tolerance testing day schematic.

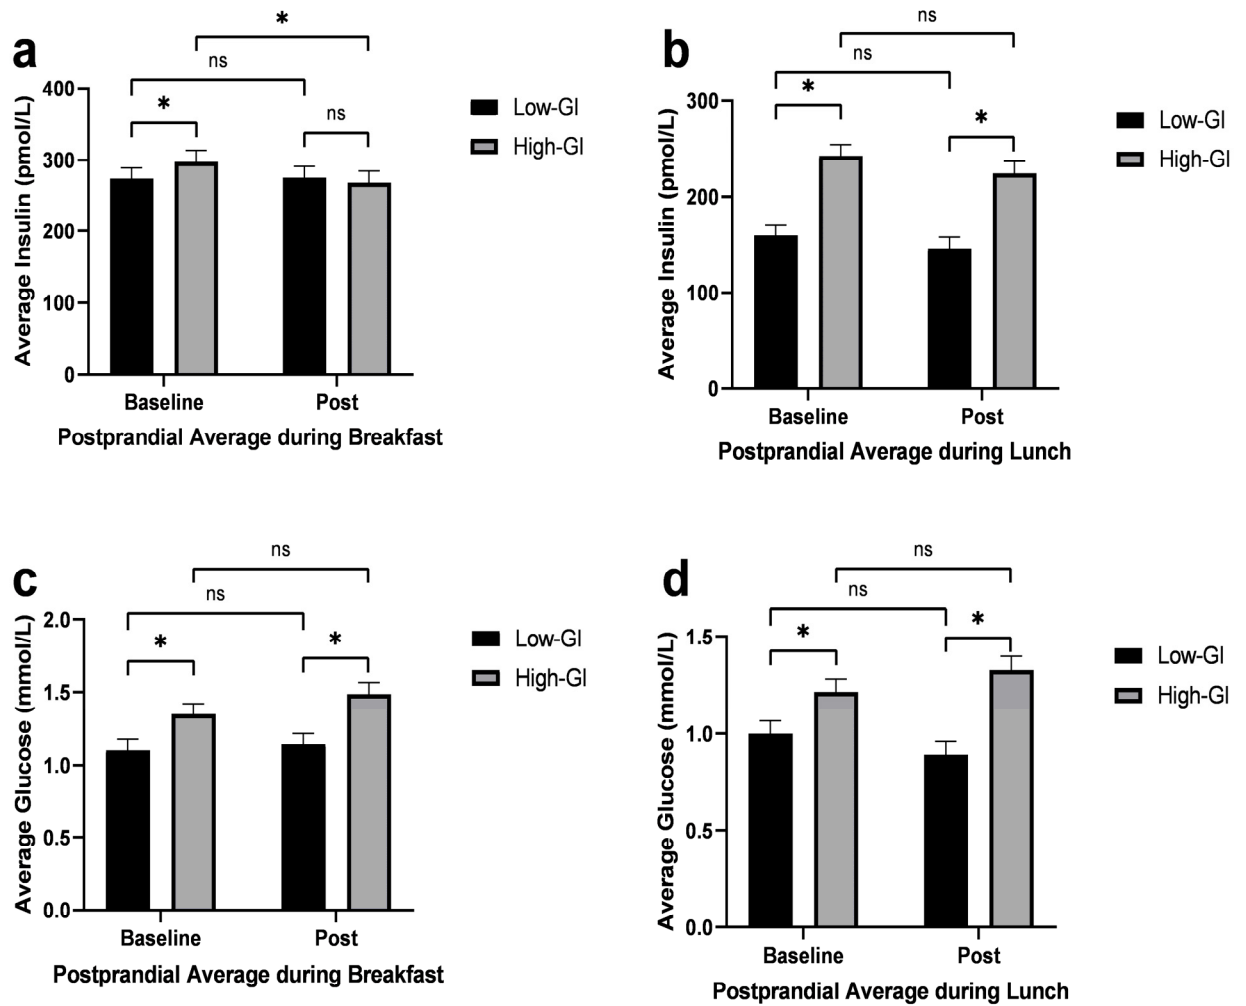

**Supplemental Figure S2** - Insulin (a, b) and glucose (c, d) elevations above fasting concentrations in response to Low-GI and High-GI breakfast (a, c; served at timepoint=0min) and lunch (b, d; served at timepoint=240min) meals during 8-h meal glucose tolerance tests at baseline and after a 12-week dietary intervention. Data are LSmeans  $\pm$  SEM. \*Statistically significant,  $p < 0.05$ .

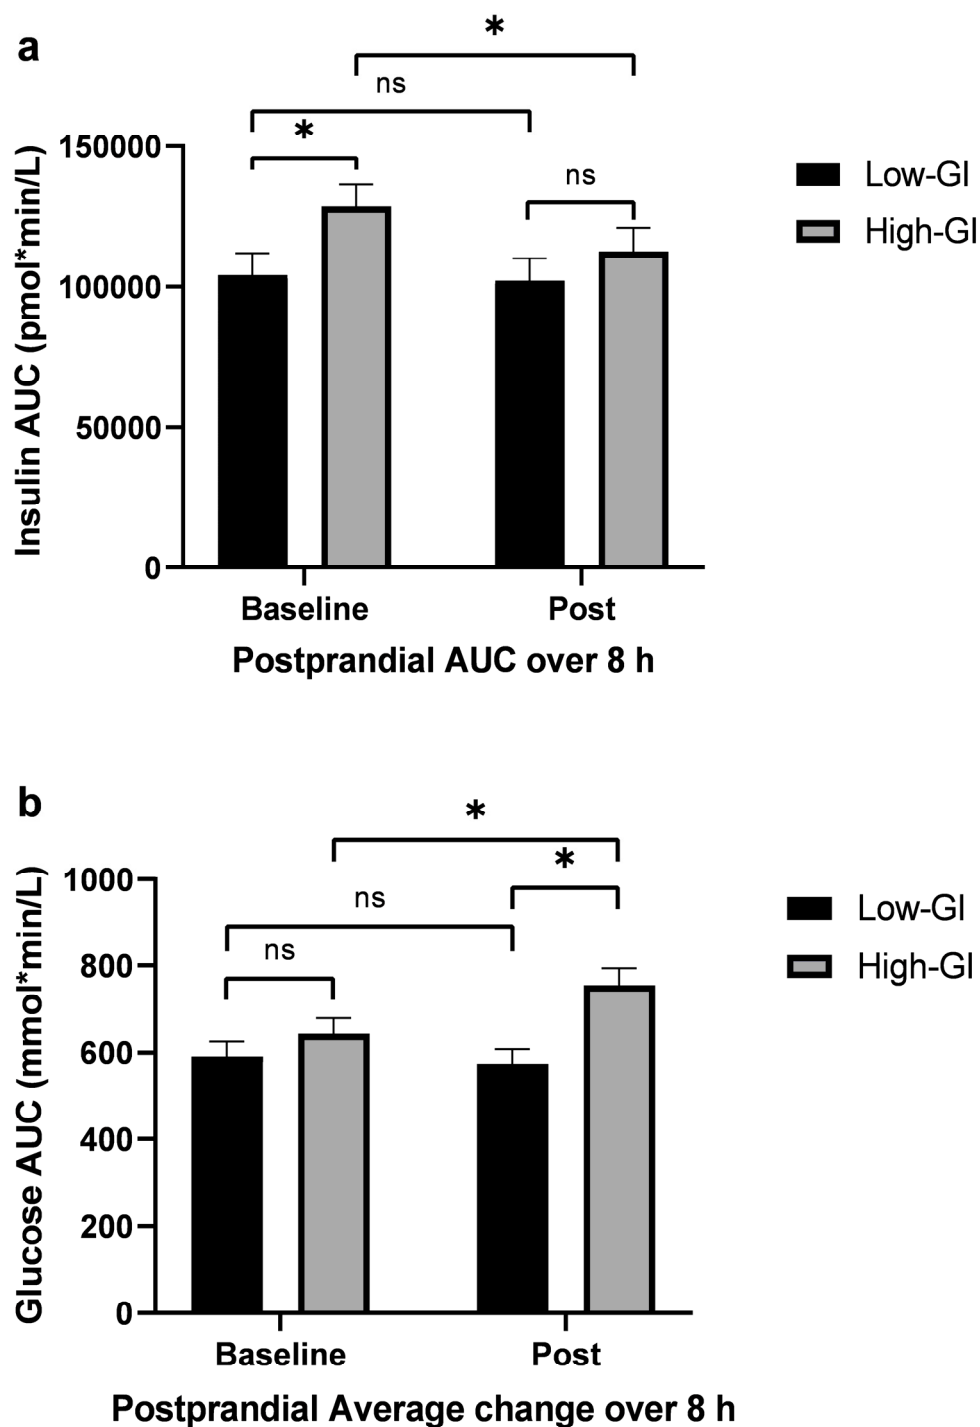

**Supplemental Figure S3** – Insulin (a) and glucose (b) postprandial areas under the curve (AUC) in response to Low-GI and High-GI meals during 8-h meal glucose tolerance tests at baseline and after a 12-week dietary intervention. Data are LSmeans  $\pm$  SEM. \*Statistically significant,  $p < 0.05$ .

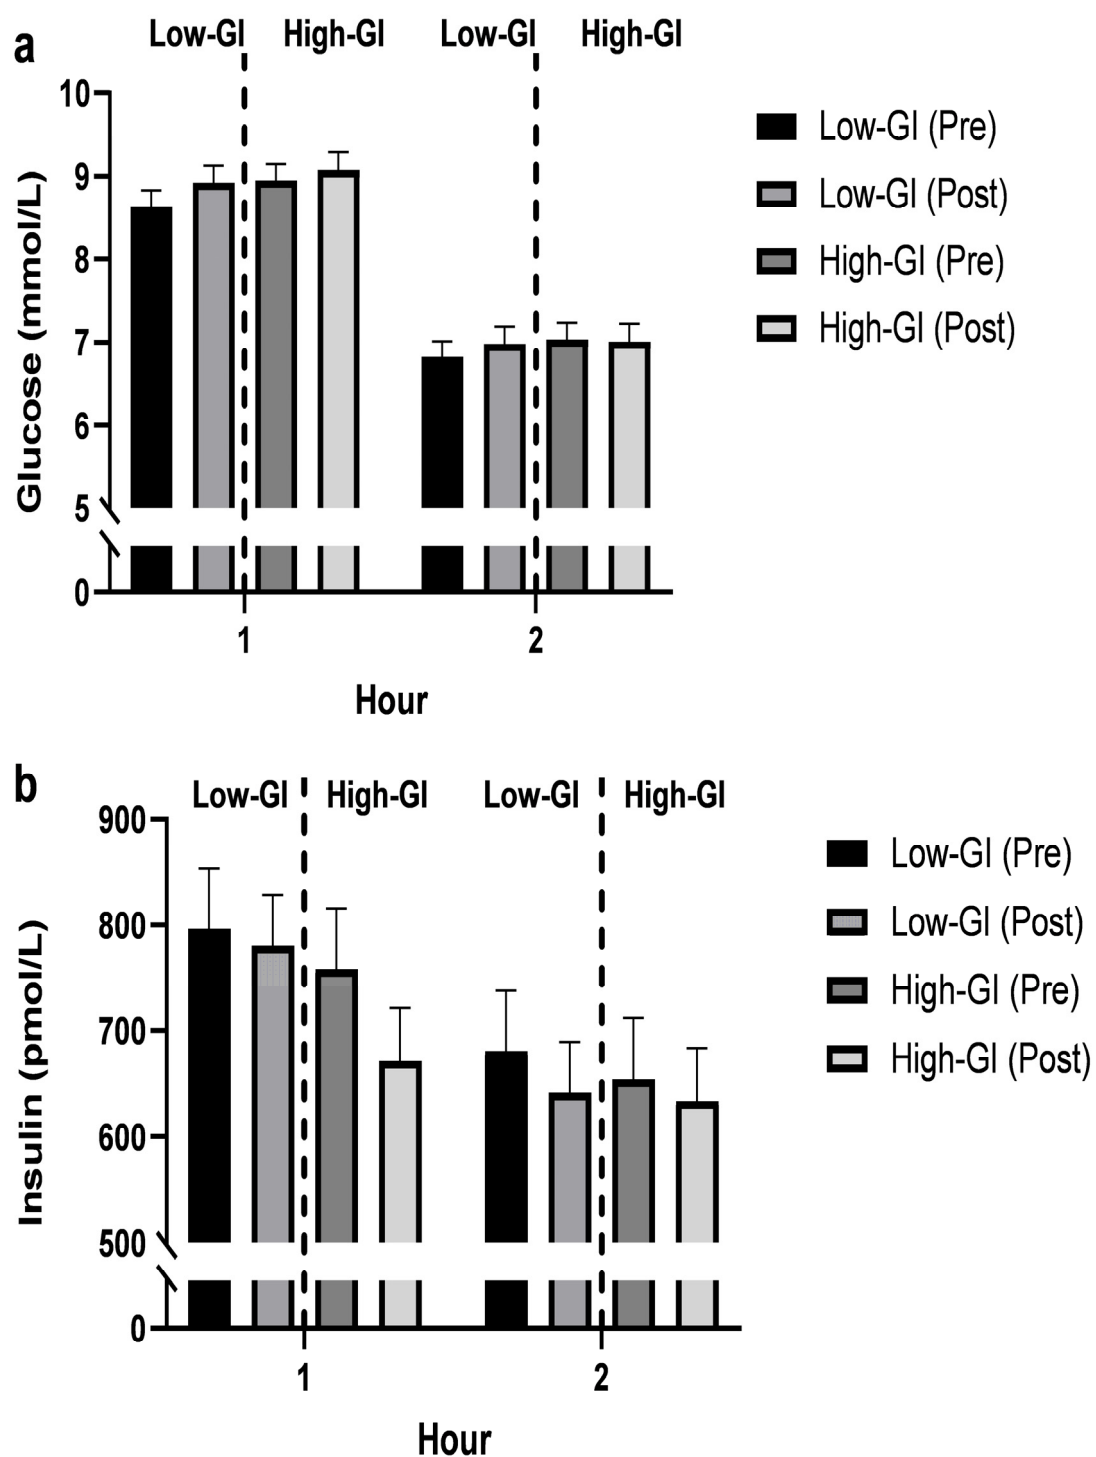

**Supplemental Figure S4** – 1-h and 2-h glucose and insulin responses at to a 2-h oral glucose tolerance test (75g glucose bolus). Data are LSmeans  $\pm$  SEM. \*Statistically significant,  $p < 0.05$ .
